# Supplementary figures and images for: Development of a Wet-Granulated Sourdough Multiple Starter for Direct Use
Source: MDPI journal article supplement (doi:10.3390/foods11091278), 2022-04-28

Figure S1

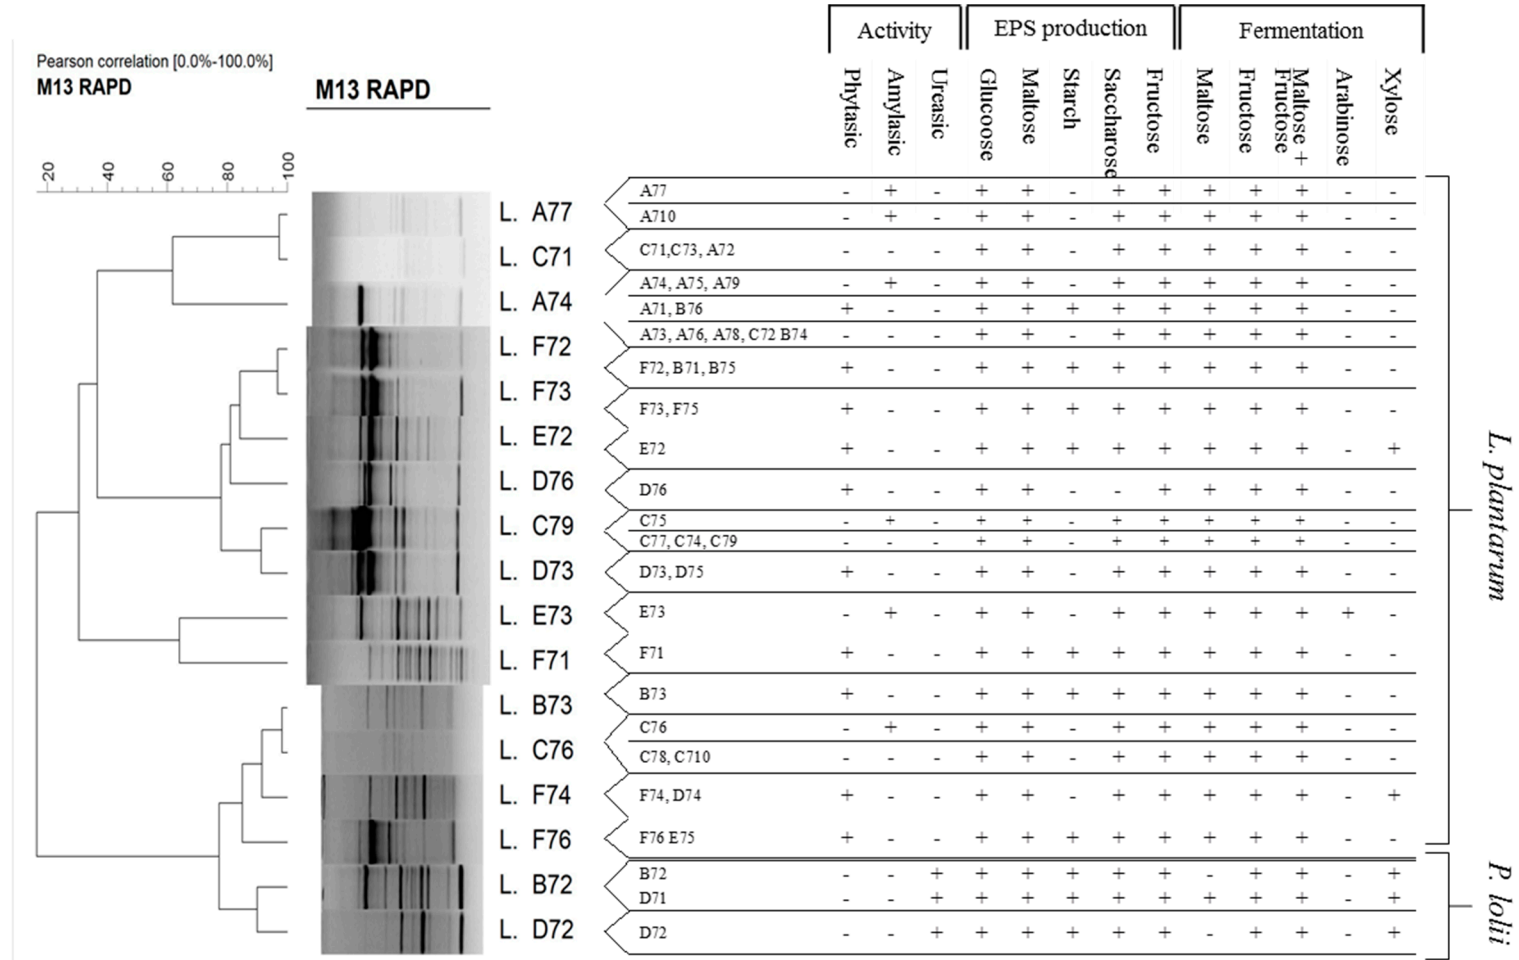

Figure S2

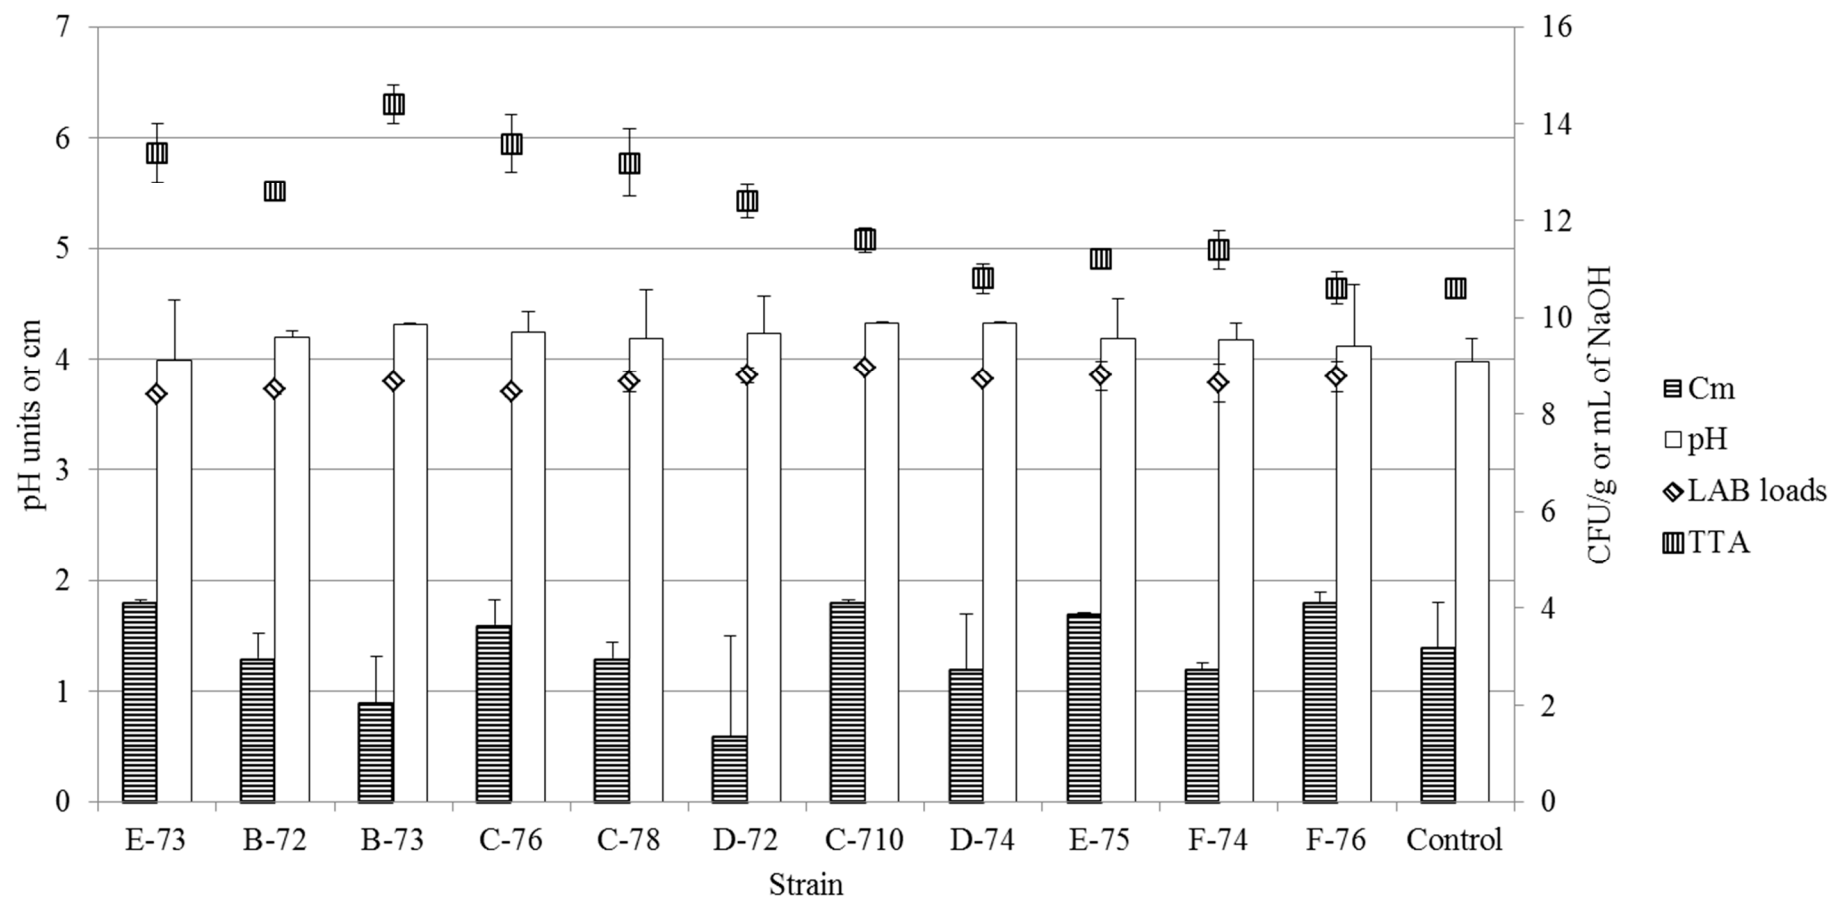

Figure S3

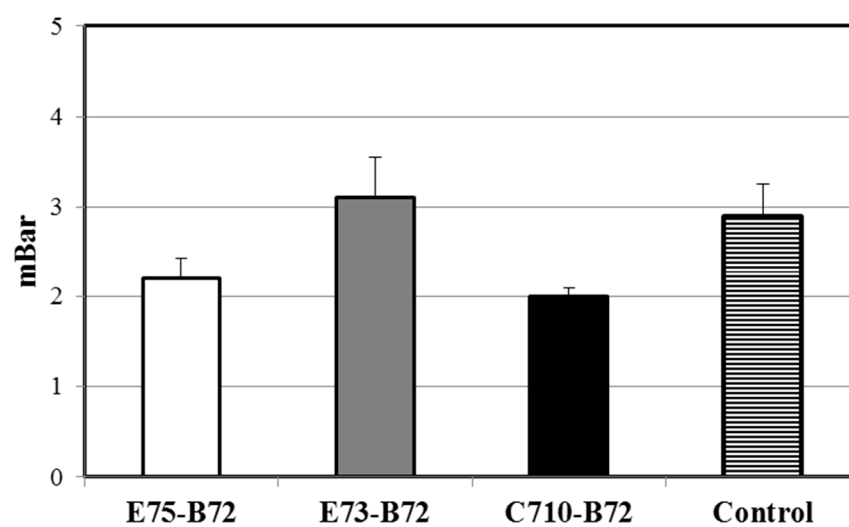

Figure S4

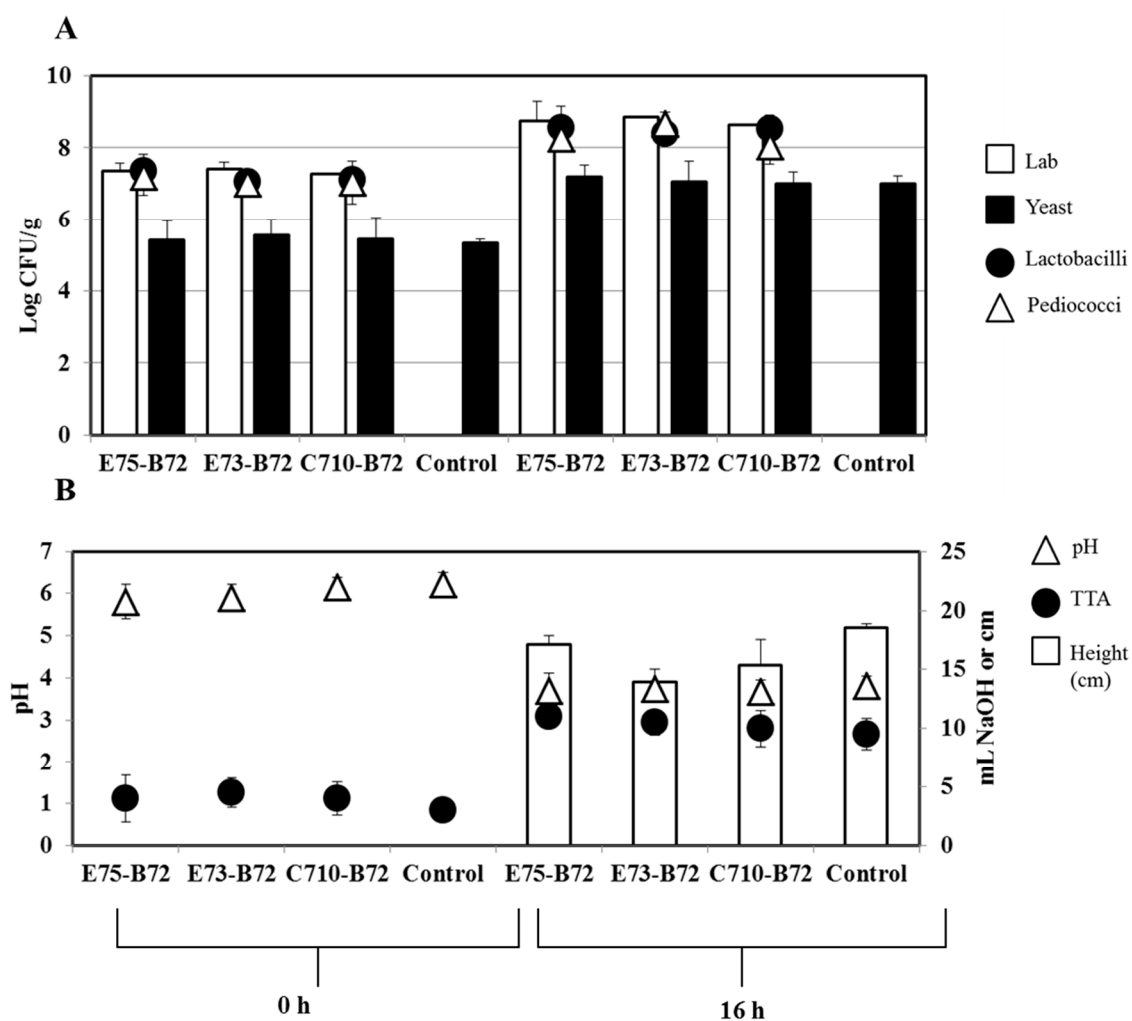

Supplement: s1 [file s1]
